# Supplementary material
Source: publisher figshare collection journal article supplement (https://gsapubs.figshare.com/ndownloader/files/36562086)
Supplement: Supplementary file 1 [file 36562086]

## Sheet: Table S2
Sample ID	U1339 mbsf (m)	Mean Grain Size (um)	% volume clay-size (<4um)	% Silt (4-63um)	% very fine sand (63-125um)	% fine sand (125-250um)	% medium sand (250-500um)	% Total Diatoms (pennate + centric)	% Pennate	% Total Centric Diatom	% Centric Diatom Fragment	% Whole Centric	Normalized % Whole Centric	% Sponge Spicules	% Radiolarian	% Silicoflagellates	% Forams	% Coccoliths	% Volcanic Material	% Clay Minerals	% Opaque Material	% Siliciclastic Material
U1339B_1H_1_TOC(0.1-0.2)	0.1	27.9232	9.46997	58.2474	10.6252	21.2109	0.4465	67.7778	23.3333	44.4444	44.4444	0	0	0	0	0	0	0	0	23.3333	0	8.88889
U1339B_1H_1_TOC(0.35-0.45)	0.35	22.689	11.501	62.0977	8.4775	17.1296	0.7942	69.0754	23.0122	46.0632	36.519	9.54416	20.7197	0	0	0	0	0	0	20.4481	0	10.4766
U1339B_1H_1_TOC(0.6-0.7)	0.6	24.9883	10.6581	59.6785	9.2322	19.8804	0.5508	57.8788	20.8225	37.0563	30.9957	6.06061	16.3551	0	0	4.7619	0	0	0	17.4892	2.38095	17.4892
U1339A_1H_1, 70.0 cm	0.689	23.6066	11.2571	60.7331	9.2369	18.2131	0.5598	73.53	21.2	52.33	45.48	6.85	20	0	0	0.77	0	0	5.63	7.29	7.04	5.73
U1339B_1H_1_TOC(0.85-0.95)	0.85	20.4378	12.786	63.2761	7.7345	15.8085	0.3949	59.6154	8.33333	51.2821	45.7265	5.55556	10.8333	0	0	0	0	0	0	16.2393	2.5641	21.5812
U1339B_1H_1_TOC(1.1-2.1)	1.1	21.6256	11.9736	62.6012	10.1668	15.0843	0.1741	58.079	12.3525	45.7265	40.9646	4.7619	10.4139	0	0	0	0	0	0	19.6785	0	22.2426
U1339B_1H_1_TOC(1.3-1.4)	1.3	18.8189	13.5635	65.7506	8.8438	11.7443	0.0978	70.671	18.0195	52.6515	40.1515	12.5	23.741	0	0	0	0	0	0	21.5368	2.38095	5.41126
U1339B_1H_2_TOC(0.1-0.2)	1.6	16.4911	17.1253	61.6349	9.4108	11.8077	0.0213	50.3922	9.33824	41.0539	28.9216	12.1324	29.5522	2.08333	0	0	0	0	1.96078	26.8873	6.0049	12.6716
U1339B_1H_2_TOC(0.35-0.45)	1.85	15.4197	16.9953	64.9341	6.9062	11.0772	0.0872	49.127	7.69841	41.4286	38.6508	2.77778	6.70498	0	0	0	0	0	9.48413	20.0397	4.64286	16.7063
U1339B_1H_2_TOC(0.6-0.7)	2.1	13.5655	18.9147	64.4877	7.6931	8.8838	0.0207	51.0101	8.58586	42.4242	36.8687	5.55556	13.0952	0	0	0	0	0	3.0303	25.7576	5.80808	14.3939
U1339A_1H_2, 70.0 cm	2.174	14.4265	17.6431	65.1191	7.216	9.995	0.0268	37.7778	12.2222	25.5556	25.5556	0	0	0	0	0	0	6.11111	5.55556	21.6667	3.33333	25.5556
U1339B_1H_2_TOC(0.85-0.95)	2.35	8.63805	25.6702	67.7772	4.9744	1.5782	0	22.7142	2.08333	20.6309	20.6309	0	0	0	0	0	0	0	17.1221	35.5179	3.83772	20.808
U1339B_1H_2_TOC(1.1-1.2)	2.6	14.5824	17.0545	66.9466	7.1398	8.5198	0.3393	45.7672	8.86243	36.9048	26.5873	10.3175	27.957	0	0	0	0	11.2434	2.38095	20.5026	2.77778	17.328
U1339B_1H_2_TOC(1.3-1.4)	2.8	15.1597	17.275	62.8662	8.5034	11.3174	0.038	43.3333	10	33.3333	33.3333	0	0	0	0	0	0	3.33333	6.66667	26.6667	3.33333	16.6667
U1339B_1H_3_TOC(0.2-0.3)	3.2	7.22514	34.7036	56.4645	7.37	1.4619	0	19.8616	0	19.8616	19.8616	0	0	0	0	0	0	0	23.5653	34.5136	8.46561	13.5938
U1339A_1H_3_W(121)	4.45	7.54794	34.0746	56.9026	8.5019	0.5209	0	36.4057	5.78704	30.6187	26.452	4.16667	13.6082	0	0	0	0	0	19.0446	22.7483	2.08333	19.718
U1339A_2H_2, 70.0cm	6.4	6.65922	35.9246	59.8796	4.1958	0	0	21.0829	1.53846	19.5444	18.6353	0.909091	4.65141	0	0	0	0	0	18.721	36.4539	5.47558	18.2667
U1339B_2H_2_TOC(0.9-1.0)	7.029	6.25034	37.1115	61.2376	1.6509	0	0	41.6667	7.87037	33.7963	24.0741	9.72222	28.7671	0	0	0	0	0	21.2963	17.1296	0	19.9074
U1339A_2H_2_XRD(0-0)	7.85	4.49235	45.148	54.8461	0.0059	0	0	30.9091	3.0303	27.8788	27.8788	0	0	0	0	0	0	0	19.0909	28.1818	0	21.8182
U1339B_2H_3_TOC(0.9-1.0)	7.9	12.7429	24.7995	56.8478	12.0399	6.3128	0	30.5736	3.0303	27.5433	27.5433	0	0	0	0	0	0	0	45.5087	11.9589	0	11.9589
U1339A_2H_3, 70.0 cm	8.474	9.8792	30.5081	54.0647	10.935	4.4922	0	45.8333	2.77778	43.0556	32.2222	10.8333	25.1613	0	0	0	0	0	10.2778	23.3333	4.16667	16.3889
U1339A_2H_3_W(109-111)	8.99	9.50939	30.9619	54.5536	10.9279	3.5566	0	38.7879	9.69697	29.0909	29.0909	0	0	0	0	0	0	0	29.697	19.0909	0	12.4242
U1339B_2H_4_TOC(0.9-1.0)	9.4	10.385	29.3889	55.4878	12.2432	2.8801	0	44.1725	5.59441	38.5781	38.5781	0	0	0	0	0	0	0	13.5698	20.8958	5.41126	15.9507
U1339B_2H_5_TOC(0.2-0.3)	10.2	11.9212	23.1014	63.7307	9.8368	3.3311	0	42.0635	5.15873	36.9048	30.2381	6.66667	18.0645	0	0	0	0	0	18.8095	16.9841	5.71429	16.4286
U1339A_2H_4_XRD(0-0)	10.85	8.40537	25.9916	68.5245	5.1138	0.3701	0	26.8519	7.87037	18.9815	18.9815	0	0	0	0	0	0	0	12.037	26.8519	7.40741	26.8519
U1339B_2H_5_TOC(0.9-1.0)	10.9	14.9226	19.4375	61.5467	11.2436	7.7703	0.0019	38.7955	8.5084	30.2871	23.7395	6.54762	21.6185	0	0	0	0	0	25.035	8.5084	8.68347	18.9776
U1339A_2H_5, 70. 0cm	11.365	11.8367	27.326	54.4573	11.2184	6.9976	0.0007	30.8712	3.0303	27.8409	27.8409	0	0	0	0	0	0	0	27.0076	13.5606	3.75	24.8106
U1339B_2H_6_TOC(0.2-0.3)	11.7	10.3847	27.6836	58.7511	10.483	3.0823	0	48.4687	8.83191	39.6368	35.4701	4.16667	10.5121	0	0	0	0	0	15.5627	23.433	0	12.5356
U1339A_2H_5_W(127-129)	12.17	8.81712	29.9765	60.3204	8.547	1.1561	0	50.7937	12.3016	38.4921	25.3968	13.0952	34.0206	0	0	0	0	0	19.0476	19.8413	2.77778	7.53968
U1339A_2H_6, 70.0 cm	12.81	11.368	23.6292	63.5296	10.7332	2.108	0	39.8148	7.87037	31.9444	27.7778	4.16667	13.0435	0	0	0	0	0	24.537	15.7407	12.037	7.87037
U1339B_2H_7_TOC(0.2-0.3)	13.2	13.3869	18.7017	66.5995	9.5383	5.1605	0	57.0208	11.0297	45.991	40.8628	5.12821	11.1504	0	0	0	0	0	20.5535	6.26781	0	16.1579
U1339B_3H_1_TOC(0.2-0.3)	13.7	15.1065	18.0783	63.7291	11.6317	6.5598	0.0011	65.114	11.9801	53.1339	45.5698	7.5641	14.2359	0	0	0	0	0	1.85185	15.6838	3.51852	13.8319
U1339A_2H_6_XRD(0-0)	13.85	6.77746	33.4869	63.4358	3.0773	0	0	24.5503	0	24.5503	24.5503	0	0	0	0	0	0	0	24.2328	20.8466	0	30.3704
U1339A_3H_1, 70.0 cm	15.064	10.9811	25.8814	59.2029	10.6038	4.3112	0.0007	43.3053	6.56396	36.7414	36.7414	0	0	0	0	0	0	0	8.52474	19.6919	6.30252	22.1755
U1339B_3H_2_TOC(0.2-0.3)	15.2	10.8436	27.3549	56.9447	10.1062	5.5941	0.0001	62.2222	18.7037	43.5185	25.7407	17.7778	40.8511	0	0	0	0	0	8.33333	15.9259	0	13.5185
U1339B_3H_2_TOC(0.9-1.0)	15.9	6.83477	36.529	55.7196	7.4755	0.2759	0	36.9444	11.2037	25.7407	19.0741	6.66667	25.8993	0	0	0	0	0	18.2407	19.0741	0	25.7407
U1339A_3H_2_70.0cm	16.497	6.37856	36.6581	62.8508	0.4911	0	0	50.8333	3.33333	47.5	32.5	15	31.5789	0	0	0	0	0	10	14.1667	3.33333	21.6667
U1339B_3H_3_TOC(0.2-0.3)	16.7	12.8748	24.112	57.0693	16.5732	2.2444	0.0011	44.6609	7.79221	36.8687	26.6955	10.1732	27.593	0	0	0	0	0	16.4983	12.1453	2.38095	24.3146
U1339A_3H_2_W(145-147)	17.35	9.11096	32.0161	54.057	10.0022	3.9247	0	35.4545	3.0303	32.4242	32.4242	0	0	0	0	0	0	0	10	26.0606	0	28.4848
U1339B_3H_3_TOC(0.9-1.0)	17.4	9.10373	32.2966	53.7364	10.6567	3.3103	0	35.1852	0	35.1852	31.4815	3.7037	10.5263	0	0	0	0	0	21.2963	20.3704	2.77778	20.3704
U1339A_3H_3, 70.0 cm	17.931	9.67767	30.4552	54.766	9.4397	5.3391	0	52.9915	8.83191	44.1595	44.1595	0	0	0	0	0	0	0	16.5242	20.2279	0	10.2564
U1339B_3H_4_TOC(0.2-0.3)	18.2	6.03873	37.0351	62.8265	0.1384	0	0	31.1538	11.2393	19.9145	19.9145	0	0	0	0	0	0	0	20.1282	26.0256	0	22.6923
U1339A_3H_3_w(126-128)	18.66	7.10409	35.6028	57.0579	6.3842	0.9551	0	44.6212	8.44697	36.1742	32.0076	4.16667	11.5183	0	0	0	0	0	5.11364	22.0076	2.08333	26.1742
U1339B_3H_4_TOC(0.9-1.0)	18.9	7.58525	32.4337	62.6353	4.931	0	0	39.5238	10.4762	29.0476	29.0476	0	0	0	0	0	0	0	8.09524	29.0476	2.38095	20.9524
U1339A_3H_4, 70.0 cm	19.364	8.42763	30.0435	61.1231	7.0828	1.7506	0	51.7677	18.2828	33.4848	24.0909	9.39394	28.0543	0	0	0	0	0	2.77778	24.0909	2.77778	18.5859
U1339B_3H_5_TOC(0.2-0.3)	19.7	12.4025	21.7318	64.1165	8.5409	5.6015	0.0093	53.8149	11.9589	41.8561	30.1136	11.7424	28.0543	0	0	0	0	0	8.71212	15.855	3.0303	18.5877
U1339A_3H_4_W(145-147)	20.35	13.1754	21.6763	60.6548	10.2984	7.37	0.0005	36.4286	2.22222	34.2063	34.2063	0	0	0	0	0	0	0	26.5079	15.3175	2.22222	19.5238
U1339-3H_5, 70.0 cm	20.4	10.2025	25.3331	64.6034	7.2948	2.7687	0	62.1204	15.8581	46.2623	28.1905	18.0718	39.0637	0	0	0	0	0	4.09314	21.0355	1.80556	10.9454
U1339A_3H_5_TOC(0.9-1.0)	20.797	12.8136	21.4342	64.4858	7.4084	6.6703	0.0013	48.4175	15.2525	33.165	20.1347	13.0303	39.2893	0	0	0	0	0	15.3872	16.0606	6.73401	13.4007
U1339B_3H_6_TOC(0.2-0.3)	21.2	12.7947	20.2793	65.4397	10.2173	4.0637	0	31.0185	5.55556	25.463	22.6852	2.77778	10.9091	0	0	0	0	0	23.6111	18.9815	2.77778	23.6111
U1339B_3H_6_TOC(0.9-1.0)	21.9	12.0091	18.6463	72.3887	5.662	3.3023	0.0007	65.4971	9.06433	56.4327	45.2339	11.1988	19.8446	0	0	0	0	0	8.50877	14.7076	7.8655	3.42105
U1339A_3H_6_70.0cm	22.23	13.1596	20.0747	66.1866	7.3407	6.3511	0.0469	62.328	10	52.328	39.1005	13.2275	25.2781	0	0	0	0	0	3.7037	17.4074	4.7619	11.7989
U1339B_4H_1_TOC(0.2-0.3)	23.2	13.4114	22.1474	60.2219	8.4541	9.163	0.0136	44.6429	7.86436	36.7785	29.2027	7.57576	20.5983	0	0	0	0	0	4.41919	29.2027	3.8961	17.8391
U1339B_4H_1_TOC(0.9-1.0)	23.9	18.8672	15.8795	60.2298	11.2763	12.5959	0.0185	60.7702	19.9242	40.846	36.5404	4.30556	10.541	0	0	0	0	0	10.8333	14.6717	4.16667	9.55808
U1339B_4H_2, 70.0 cm	25.962	13.71	21.3365	62.5969	9.7843	6.2812	0.0011	65.0758	7.47475	57.601	38.0051	19.596	34.0202	0	0	0	0	0	7.19697	13.8636	4.30556	9.55808
U1339B_4H_3_TOC(0.15-0.25)	26.15	15.4206	15.8319	67.6736	10.3957	6.0983	0.0005	47.619	7.24206	40.377	30.3571	10.0198	24.8157	0	0	0	0	0	11.0119	32.0437	0	9.3254
U1339B_4H_3_TOC(0.9-1.0)	26.9	13.7553	17.3096	69.0933	8.0909	5.5049	0.0013	45.288	10.5395	34.7486	27.6057	7.14286	20.5558	0	0	0	0	0	15.4845	18.5148	4.94505	15.7676
U1339A_4H_1, 70.0 cm	27.364	13.2912	17.5722	68.4135	9.2706	4.7432	0.0005	70.7071	8.83838	61.8687	47.4747	14.3939	23.2653	0	0	0	0	0	3.0303	14.6465	0	11.6162
U1339B_4H_4_TOC(0.2-0.3)	27.7	13.6767	17.3812	68.7437	8.087	5.7872	0.0009	57.8866	5.34188	52.5447	38.3644	14.1803	26.9871	0	0	0	0	0	11.4025	16.5307	0	14.1803
U1339A_4H_3_W(126-128)	28.18	9.90575	25.2864	64.4882	8.4302	1.7952	0	31.5909	3.33333	28.2576	28.2576	0	0	0	0	0	0	0	25.7576	21.0606	3.0303	18.5606
U1339B_4H_4_TOC(0.9-1.0)	28.4	17.0215	14.8558	65.4042	10.4079	9.3134	0.0187	44.8912	13.7141	31.1772	28.6131	2.5641	8.2243	0	0	0	0	0	5.12821	25.1166	2.77778	22.0862
U1339B-5H-2, 73.0 cm	34.77	6.22048	36.431	63.5122	0.0568	0	0	39.8615	11.9249	27.9366	25.7802	2.15635	7.71874	0.4	0	0	0	0	5.90209	39.1101	4.60599	10.1203
u1339B-5H-6, 73.0cm	40.93	9.55502	NA	NA	NA	NA	NA	30.0271	5.84655	24.1805	24.1805	0	0	1.81818	0	0	0	0	15.5775	38.0658	1.76984	12.7417
U1339B-8H-1, 73.0 cm	61.73	20.8144	11.4057	64.6624	20.9517	2.9802	0	49.5465	7.00249	42.544	39.86	2.68398	6.30872	0	0	0	0	0	6.3599	9.52704	3.24268	14.5717
U1339B-8H-6, 75.0 cm	69.394	6.12	36.1934	63.761	0.0456	0	0	29.2618	7.11313	22.1487	20.7201	1.42857	6.44991	0.588235	0	0.740741	0	0	24.4977	20.0269	6.74151	14.527
U1339B-10H-1, 75.0 cm	80.73	7.83296	28.8734	70.0364	1.0902	0	0	53.0788	9.62413	43.4546	41.1426	2.31203	5.32056	0.3125	0	0	0	0	5.23545	24.5012	4.25383	12.4443
U1339B-10H-7, 75.0 cm	89.214	6.35413	36.5604	63.1097	0.3299	0	0	28.5016	5.44669	23.0549	21.9097	1.14516	4.96711	0	0	0	0	0	7.06854	45.0743	5.57346	13.7821
U1339B-12H-2, 73.0 cm	100.349	17.47	9.61784	81.3552	7.2646	1.7624	0	62.4036	14.9535	47.4501	41.0854	6.3647	13.4135	0.344828	0	0.344828	0	0	3.87937	24.6204	2.86589	5.54111
U1339B-15H-2, 73.0 cm	121.57	8.46868	28.3757	68.4183	3.206	0	0	48.4072	9.85911	38.548	33.8383	4.70978	12.218	0.416667	0	0	0	0	4.1433	35.3861	5.70036	5.9464
U1339B-16H-5, 73.0 cm	135.589	11.027	22.568	70.0228	7.4092	0	0	46.7486	11.1517	35.5969	28.6415	6.95539	19.5393	0	0	0	0	0	6.00344	21.9795	9.03556	16.2329
U1339B-17H-3, 73.0 cm	141.668	6.75532	34.9962	64.5871	0.4167	0	0	43.3258	8.65026	34.6756	33.0768	1.59875	4.61058	0	0	0	0.952381	0	6.67234	25.7279	8.77985	14.5417
U1339B-18H-3, 73.0 cm	151.38	17.0395	13.3175	71.9658	11.9695	2.7472	0	49.7575	23.1648	26.5927	20.0525	6.54023	24.5941	0	0	0	0	0	7.506	22.5585	4.96306	15.2149
U1339B-20H-3, 73.0 cm	171.22	8.76563	27.2726	68.5797	4.1477	0	0	48.2682	14.4806	33.7876	31.8567	1.93088	5.71475	0	0	0	0	0	5.18113	28.6185	5.65767	12.2745
U1339B-21H-4, 73.0 cm	181.242	12.9403	16.1374	76.9523	6.3826	0.5277	0	60.7867	12.6638	48.1228	43.0066	5.11623	10.6316	0	0	0	0	0	6.2193	16.338	4.2099	12.4461
U1339B-21H-7, 73.0 cm	185.762	13.008	19.3981	70.1357	8.3261	2.1401	0	37.0252	7.31032	29.7149	29.7149	0	0	0	0	0	0	0	15.1583	26.4619	5.23999	16.1146
U1339B-22H-8, 73.0 cm	196.163	6.97327	32.3354	66.0886	1.576	0	0	38.7105	10.8953	27.8152	25.3327	2.48251	8.92499	0	0	0	0	0	5.76501	29.7777	8.70385	17.0429

## Sheet: Info
Drake, M.K., Aiello, I.W., and Ravelo, A.C., 2022, Gamma-ray attenuation bulk density as
an indicator of diatom valve abundance and fragmentation in Pleistocene biosiliceous sediments
of the Bering Sea, in Aiello, I., Barron, J., and Ravelo, C., eds., Understanding the Monterey
Formation and Similar Biosiliceous Units across Space and Time: Geological Society of
America Special Paper 556, https://doi.org/10.1130/2022.2556(13).
